# Supplementary material for: Genome-Wide Identification and Functional Analysis of the TIFY Family Genes in Response to Abiotic Stresses and Hormone Treatments in Tartary Buckwheat (Fagopyrum tataricum)
Source: MDPI journal article supplement (doi:10.3390/ijms241310916), 2023-06-30
Supplement: s1 [file s1]

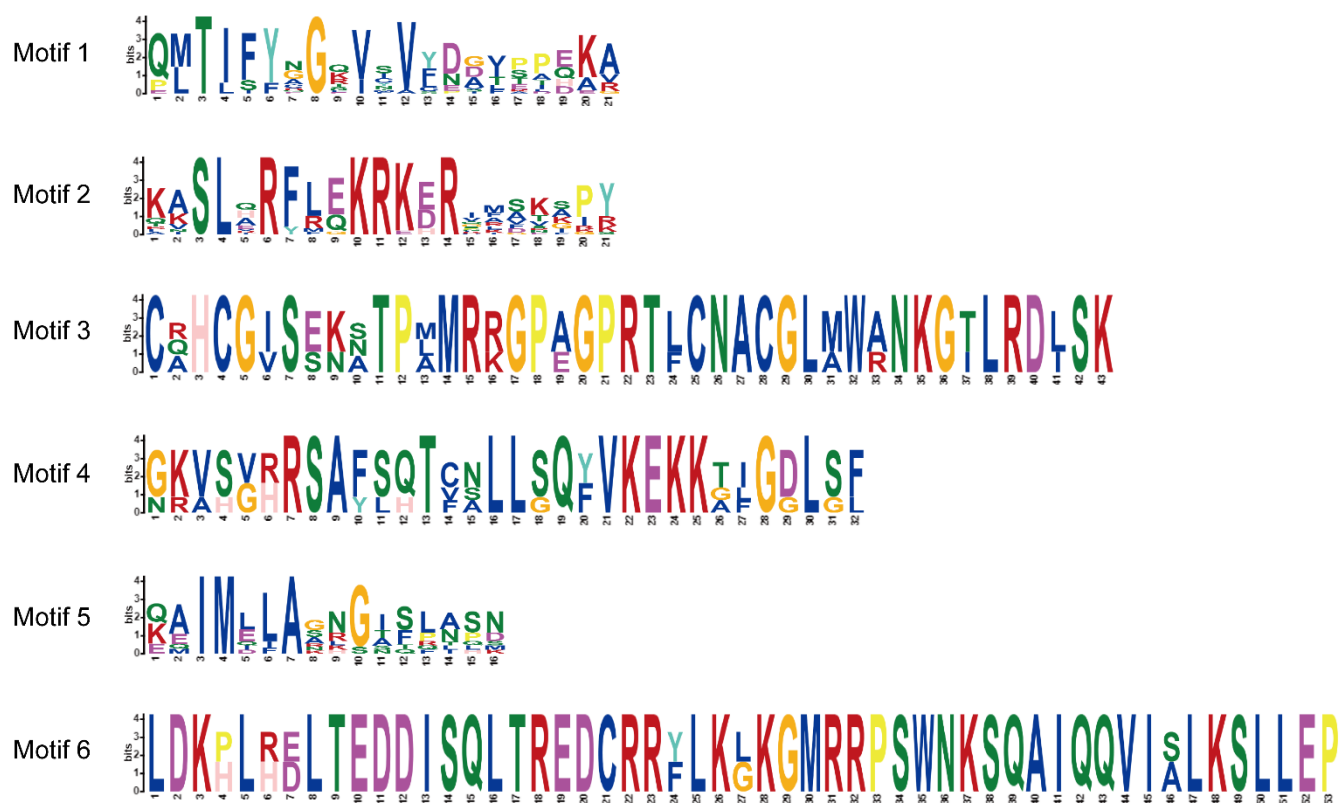

**Figure S1.** Protein motifs identified in 18 FtTIFY proteins through MEME.

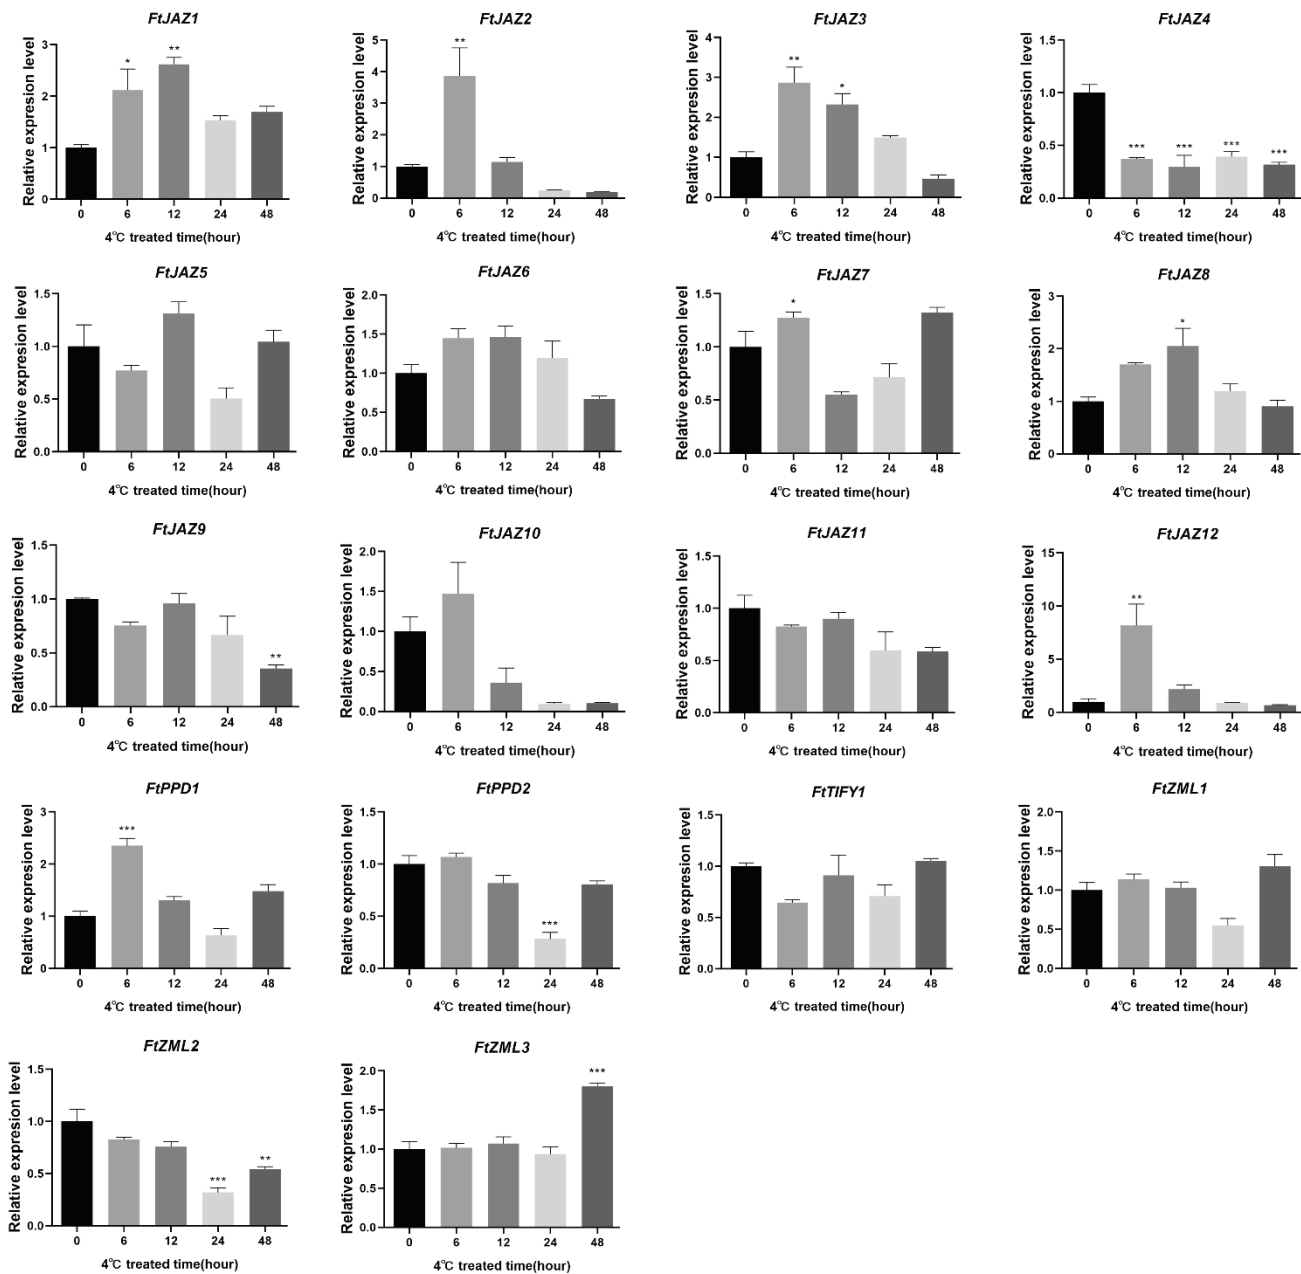

**Figure S2.** Expression profiles of *FtTIFY* genes under cold stress. The expression level at 0 h was defined as 1.0, and the expression levels at other time points were normalized accordingly. *FtH3* was used as the internal control for qRT-PCR analysis. Data were presented as the average of the three technical replicates, error bars represent SEM ( $n = 3$ ). One-way ANOVA (Tukey's test) was performed, and statistically significant differences are indicated by different asterisks (\*  $p < 0.05$ , \*\*  $p < 0.01$ , \*\*\*  $p < 0.001$ ).

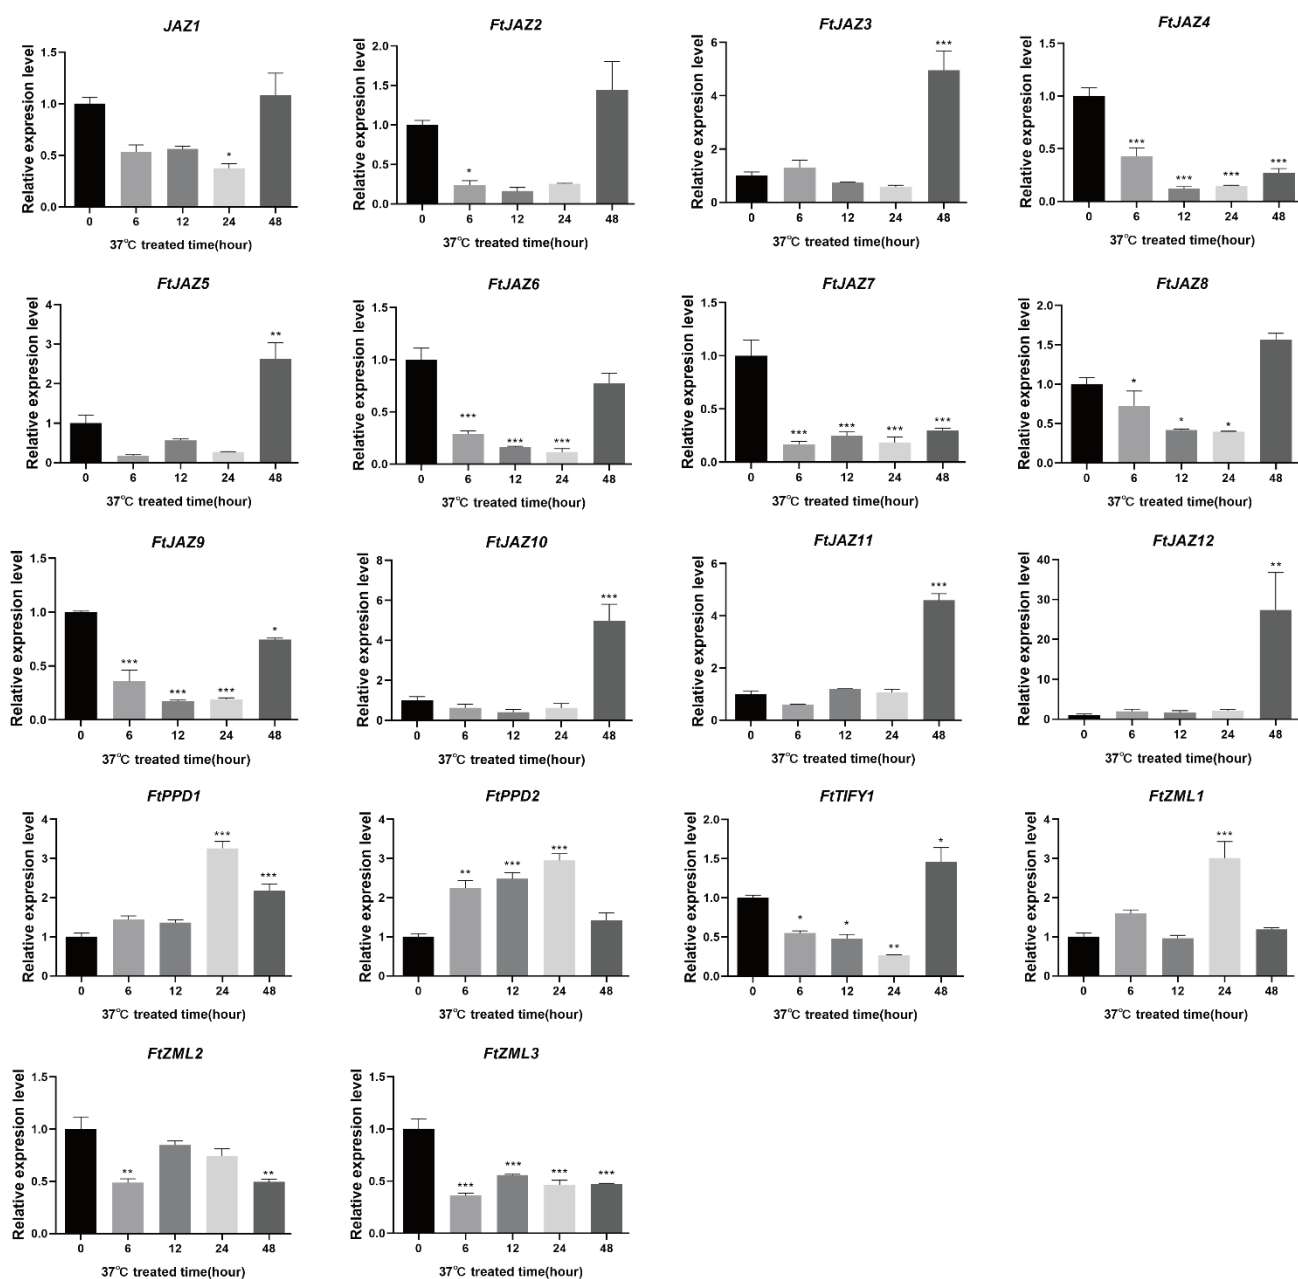

**Figure S3.** Expression profiles of *FtTIFY* genes under heat stress. The expression level at 0 h was defined as 1.0, and the expression levels at other time points were normalized accordingly. *FtH3* was used as the internal control for qRT-PCR analysis. Data were presented as the average of the three technical replicates, error bars represent SEM ( $n = 3$ ). One-way ANOVA (Tukey's test) was performed, and statistically significant differences are indicated by different asterisks (\*  $p < 0.05$ , \*\*  $p < 0.01$ , \*\*\*  $p < 0.001$ ).

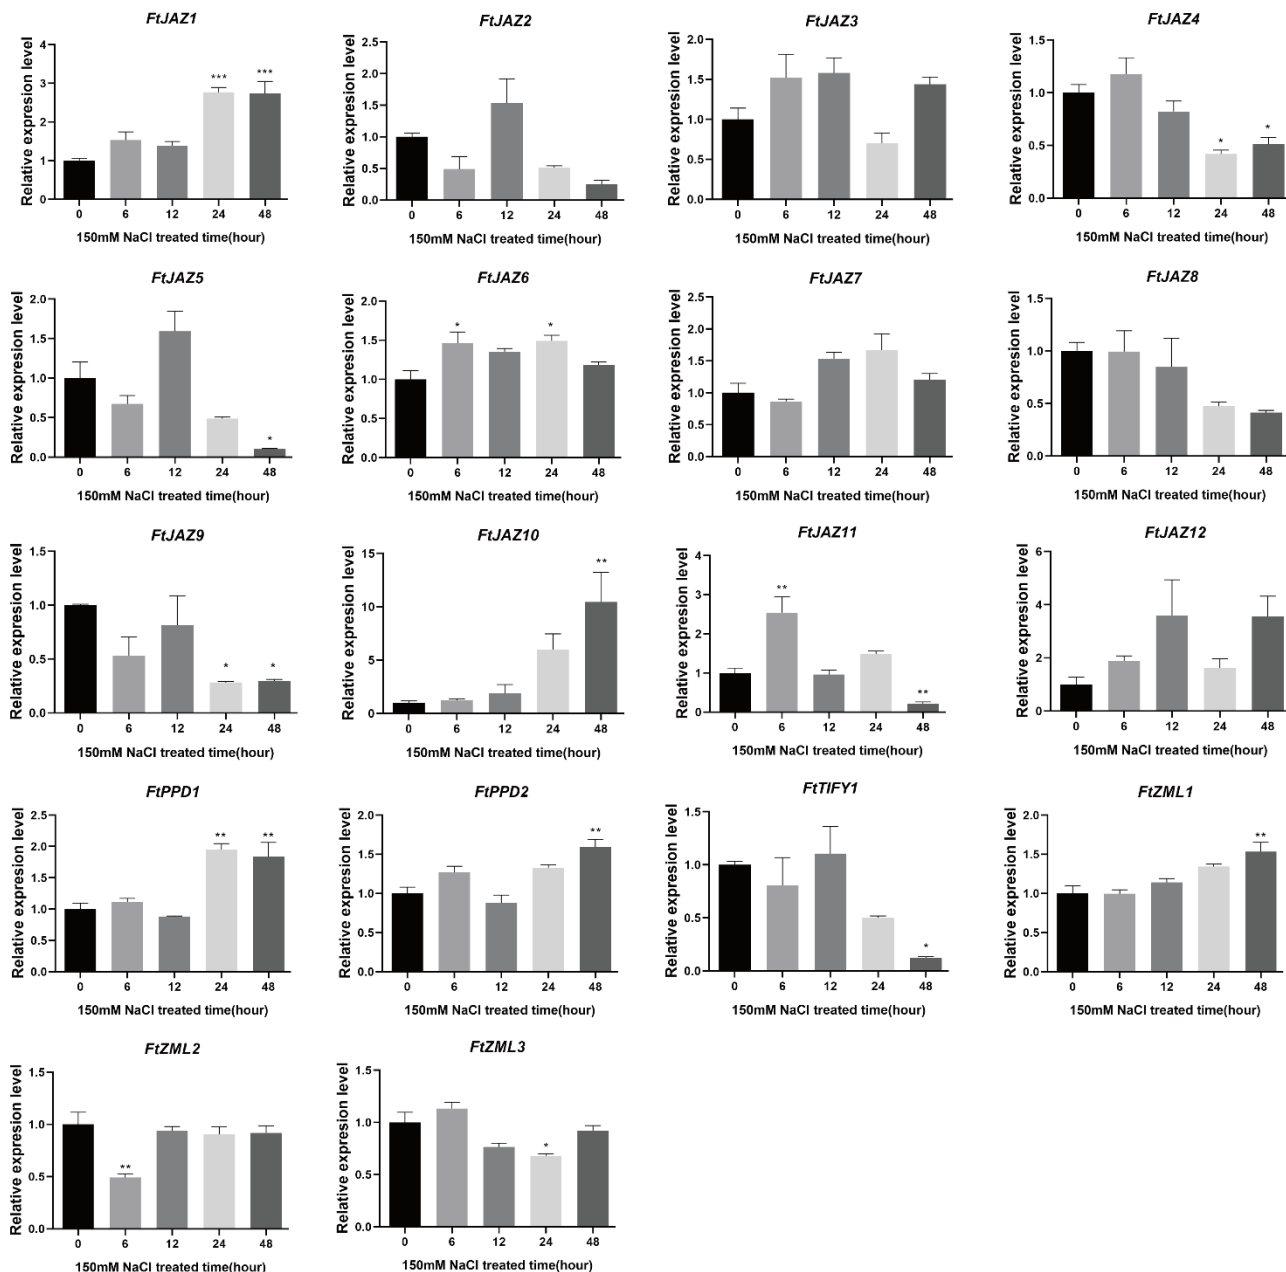

**Figure S4.** Expression profiles of *FtTIFY* genes under salt stress. The expression level at 0 h was defined as 1.0, and the expression levels at other time points were normalized accordingly. *FtH3* was used as the internal control for qRT-PCR analysis. Data were presented as the average of the three technical replicates, error bars represent SEM ( $n = 3$ ). One-way ANOVA (Tukey's test) was performed, and statistically significant differences are indicated by different asterisks (\*  $p < 0.05$ , \*\*  $p < 0.01$ , \*\*\*  $p < 0.001$ ).

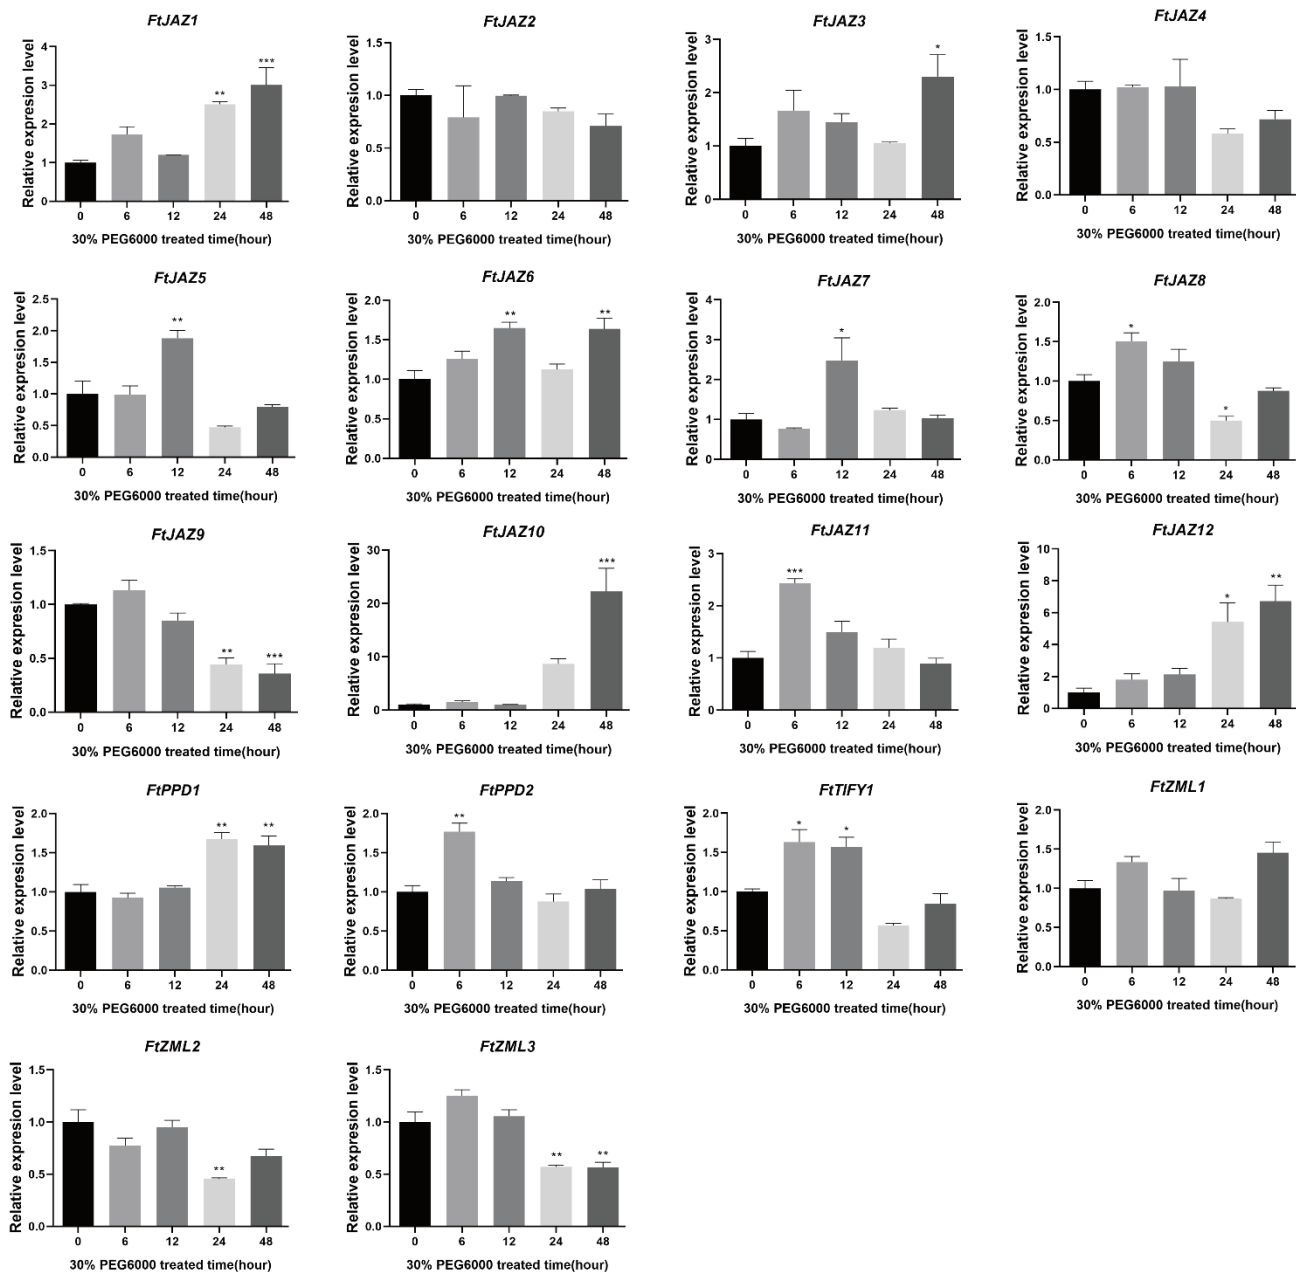

**Figure S5.** Expression profiles of *FtTIFY* genes under drought stress. The expression level at 0 h was defined as 1.0, and the expression levels at other time points were normalized accordingly. *FtH3* was used as the internal control for qRT-PCR analysis. Data were presented as the average of the three technical replicates, error bars represent SEM ( $n = 3$ ). One-way ANOVA (Tukey's test) was performed, and statistically significant differences are indicated by different asterisks (\*  $p < 0.05$ , \*\*  $p < 0.01$ , \*\*\*  $p < 0.001$ ).

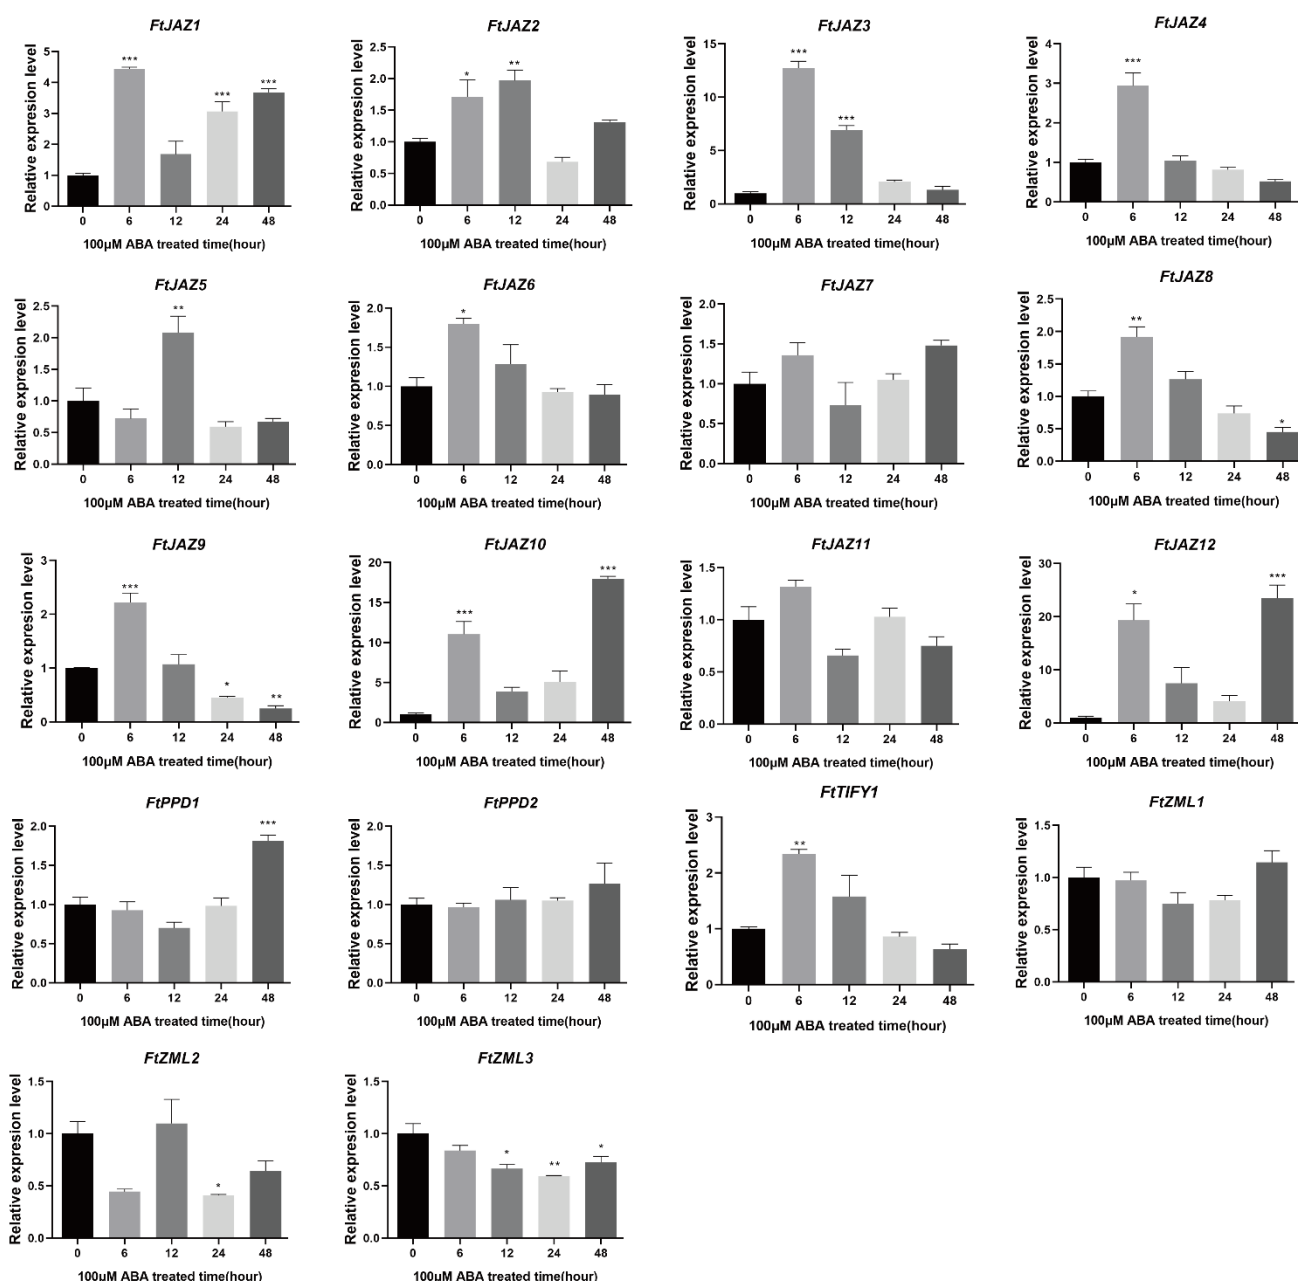

**Figure S6.** Expression profiles of *FtTIFY* genes under ABA treatment. The expression level at 0 h was defined as 1.0, and the expression levels at other time points were normalized accordingly. *FtH3* was used as the internal control for qRT-PCR analysis. Data were presented as the average of the three technical replicates, error bars represent SEM ( $n = 3$ ). One-way ANOVA (Tukey's test) was performed, and statistically significant differences are indicated by different asterisks (\*  $p < 0.05$ , \*\*  $p < 0.01$ , \*\*\*  $p < 0.001$ ).

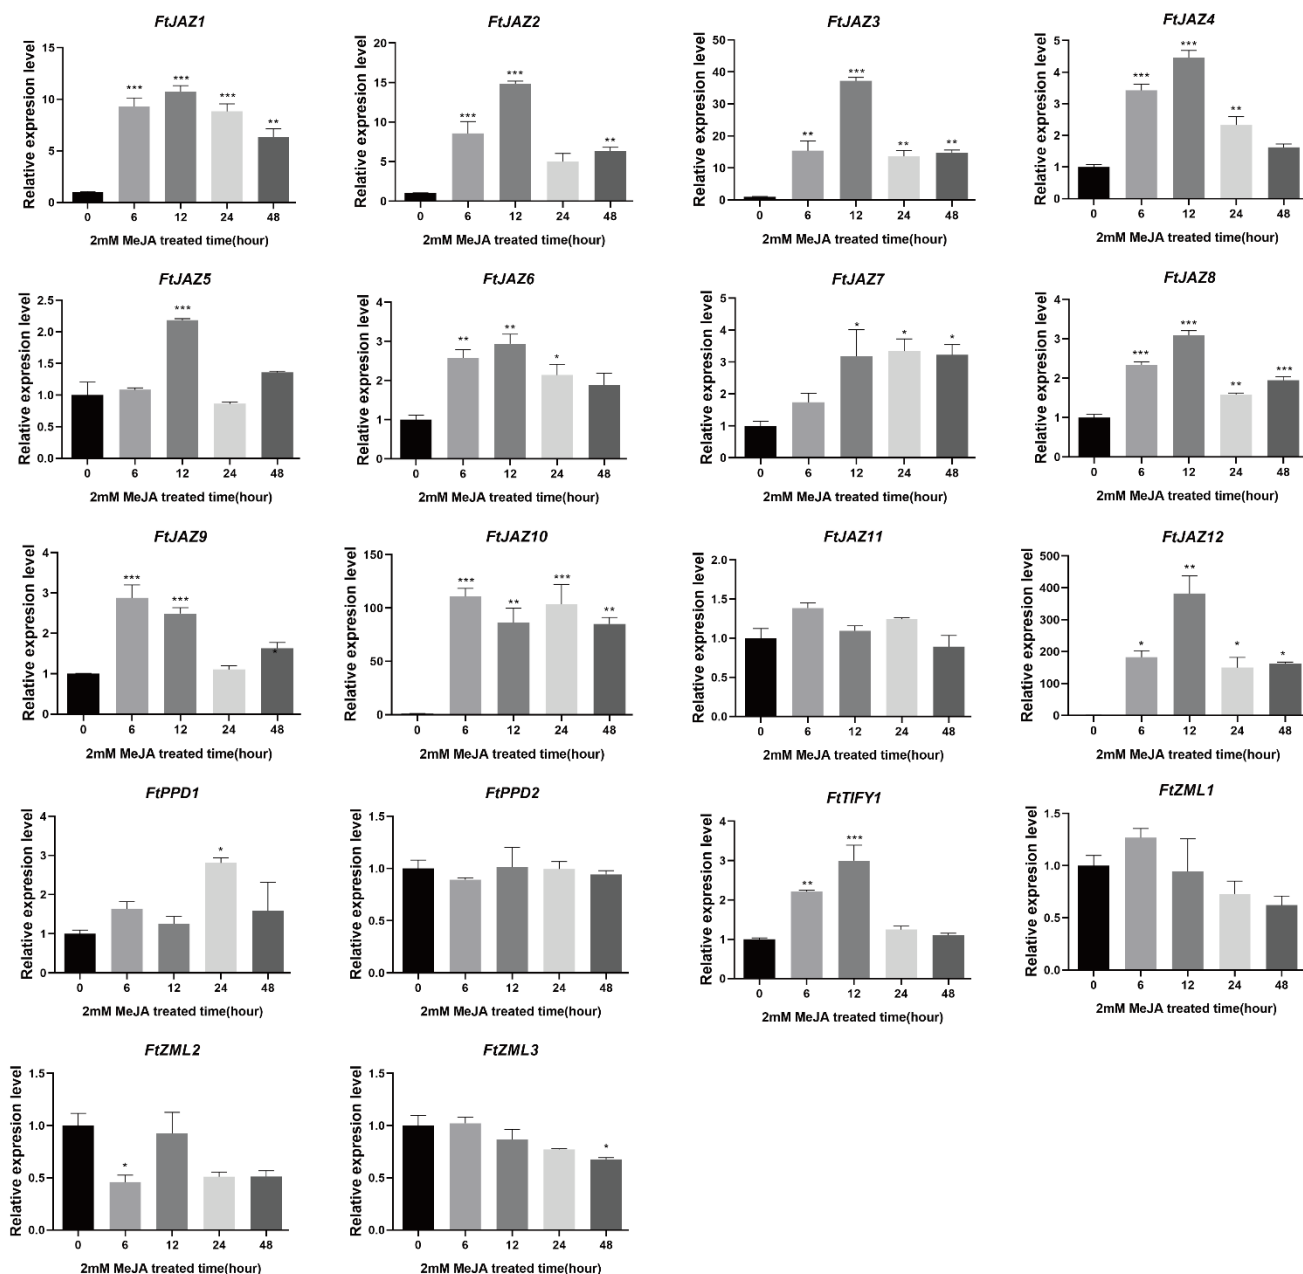

**Figure S7.** Expression profiles of *FtTIFY* genes under MeJA treatment. The expression level at 0 h was defined as 1.0, and the expression levels at other time points were normalized accordingly. *FtH3* was used as the internal control for qRT-PCR analysis. Data were presented as the average of the three technical replicates, error bars represent SEM ( $n = 3$ ). One-way ANOVA (Tukey's test) was performed, and statistically significant differences are indicated by different asterisks (\*  $p < 0.05$ , \*\*  $p < 0.01$ , \*\*\*  $p < 0.001$ ).

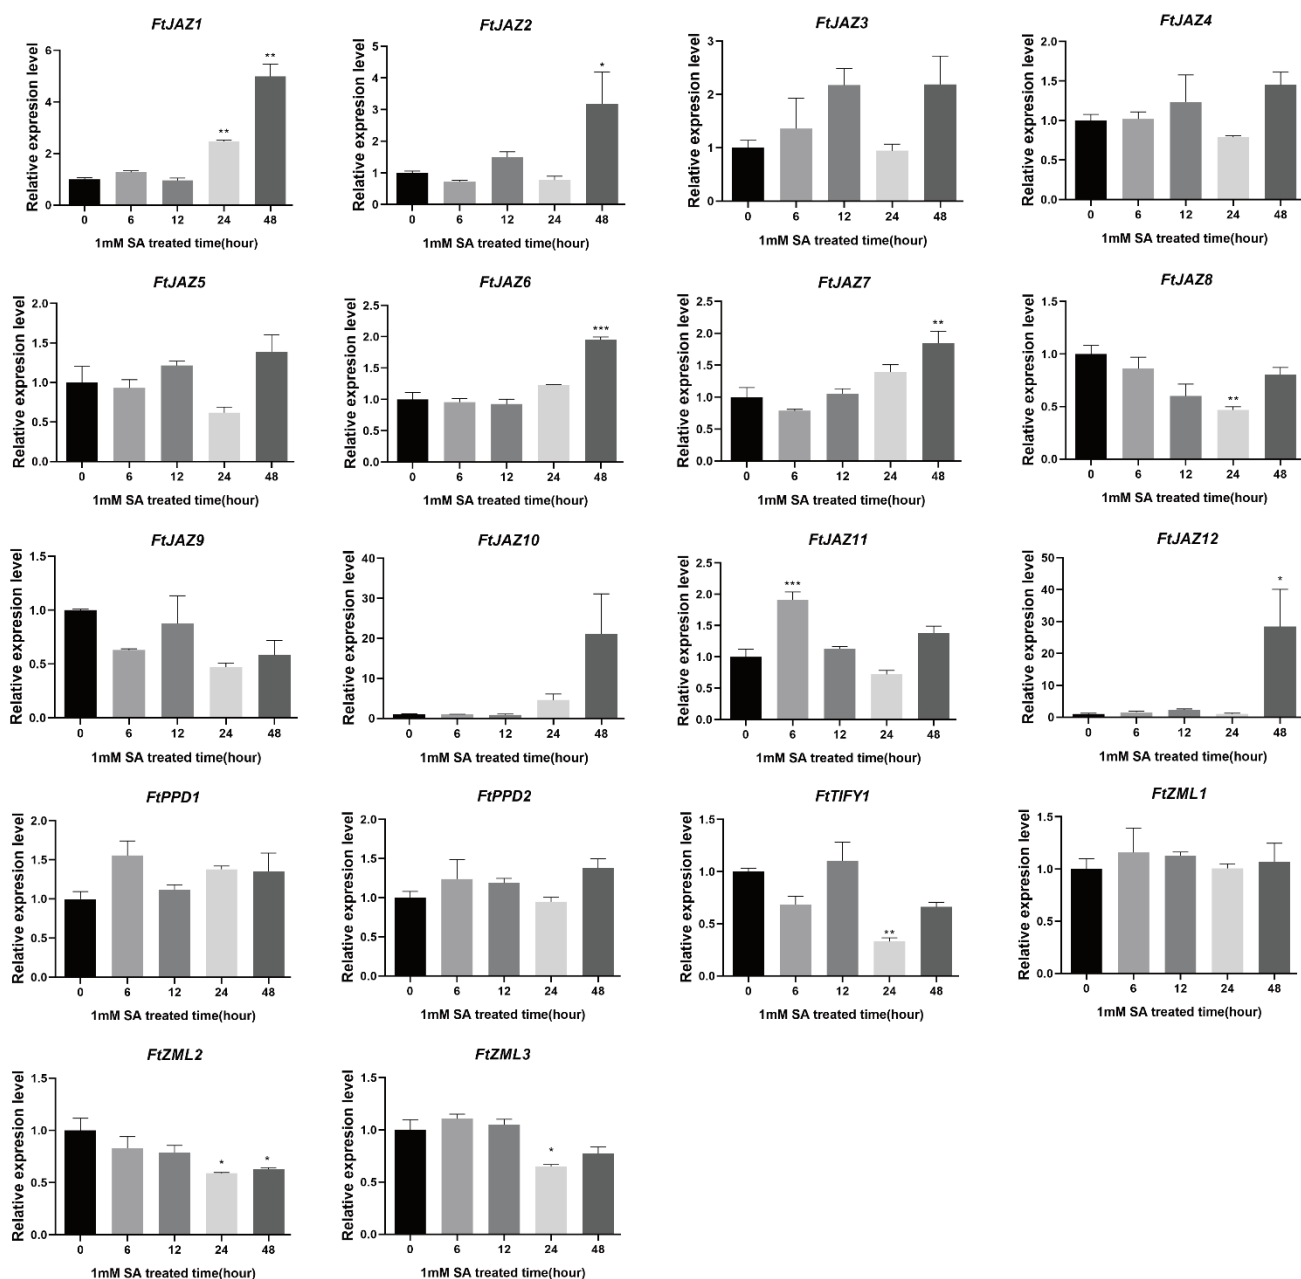

**Figure S8.** Expression profiles of *FtTIFY* genes under SA treatment. The expression level at 0 h was defined as 1.0, and the expression levels at other time points were normalized accordingly. *FtH3* was used as the internal control for qRT-PCR analysis. Data were presented as the average of the three technical replicates, error bars represent SEM ( $n = 3$ ). One-way ANOVA (Tukey's test) was performed, and statistically significant differences are indicated by different asterisks (\*  $p < 0.05$ , \*\*  $p < 0.01$ , \*\*\*  $p < 0.001$ ).



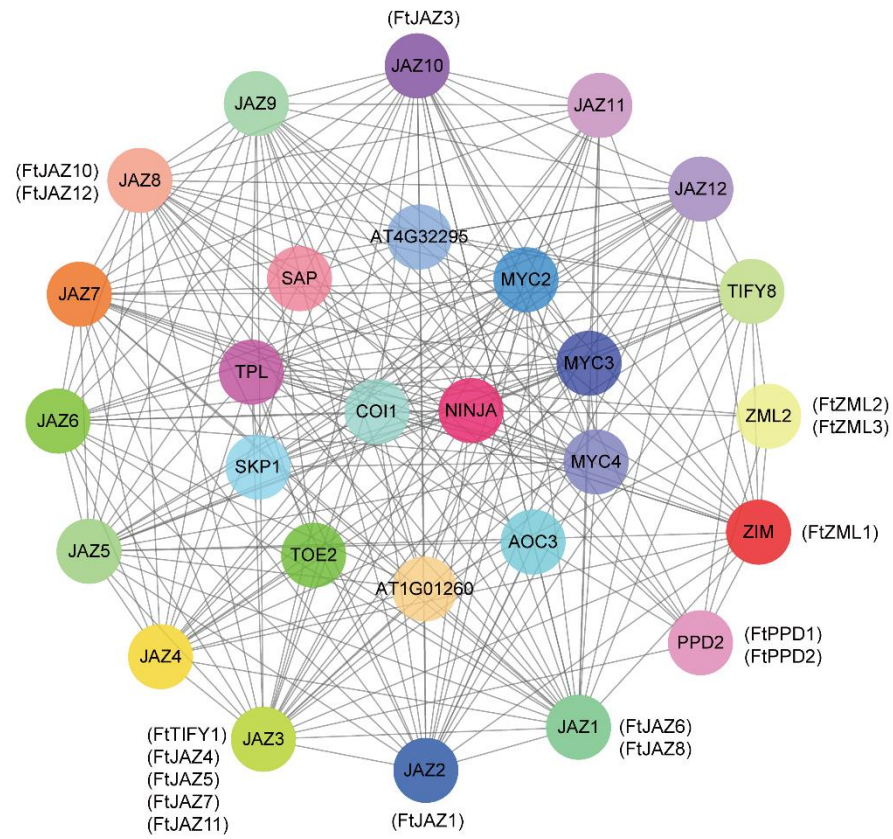

**Figure S9.** Protein-protein interaction network of FtTIFY proteins according to the orthologs in *Arabidopsis thaliana*.
