# Supplementary material for: Genome-Wide Identification and Functional Analysis of the TIFY Family Genes in Response to Abiotic Stresses and Hormone Treatments in Tartary Buckwheat (Fagopyrum tataricum)
Source: Int J Mol Sci. 2023 Jun 30;24(13):10916. doi: 10.3390/ijms241310916 (PMC10341436; doi:10.3390/ijms241310916)
Supplement: Supplementary file 1 [file ijms-24-10916-s001.zip]

Archive with 5 entries (5 files):
- Figures S1–S9.pdf
- Table S1.xlsx
- Table S2.xlsx
- Table S3.xlsx
- Table S4.xlsx
