# Supplementary material for: Genome-Wide Identification and Functional Analysis of the TIFY Family Genes in Response to Abiotic Stresses and Hormone Treatments in Tartary Buckwheat (Fagopyrum tataricum)
Source: Int J Mol Sci. 2023 Jun 30;24(13):10916. doi: 10.3390/ijms241310916 (PMC10341436; doi:10.3390/ijms241310916)
Supplement: Supplementary file 1 [file ijms-24-10916-s001.zip › Table S1.xlsx]

## Sheet: Sheet1
Table S1. Primers for qRT-PCR
Gene name	Forward Primer(5`-3`)	Reverse Primer(5`-3`)	Amplicon size (bp)
FtH3	GAAATTCGCAAGTACCAGAAGAG	CCAACAAGGTATGCCTCAGC	158
FtJAZ1	TATGGTGGGCAAGTCATGGTC	CATCTGGCGGTGGTTGTTATC	135
FtJAZ2	AGGCAAGTAAGCAAATGGAGC	TGACGAAGACGAACCCGAC	119
FtJAZ3	CGTTAAGAACAACAACCACCCATC	TTTACTTGCCAACCCAGAAGG	151
FtJAZ4	TTCCTCAGTTCATGTCACTTAAACC	CAGGAGCAGCAACAGACTTCA	195
FtJAZ5	TTGCTTCTGACAAGATTCCTCCTA	TTCTGTCGTTTTGGTCACCGTTT	128
FtJAZ6	ACTGCTCGTGTTGTTGGTCAT	GTAGGGAGTTCTTCCTCGTCAAT	175
FtJAZ7	GATCCCTACGCAATCTCAAAACATA	TGTAAGGCGATACGCTCATTACC	203
FtJAZ8	ACAATCAACCACGCCAGTC	GTCTGCCTTGCTTGTGTTGTAG	124
FtJAZ9	TCATAGATCGGCTTACTCACAGAC	TCTCCAGCGGGTTTATTGTTTACT	177
FtJAZ10	GGAATCGGACCCTCCTCC	CGCCTTCGTTTCTCCCTCT	143
FtJAZ11	TCGGTTGGTGCCTGTATGA	TGAGGAAAGCTATTCTGATTGGATG	209
FtJAZ12	TATTATGGATGGCGAGTAAGCAAAT	ATACCCGACGATGAAGACGAC	148
FtTIFY1	ATGACGGTGACTTCCCCTG	CATTATAGCCTGAGCCTTCTCG	156
FtPPD1	AGACTGCCGTCGTTACCTC	AGCTCCATCATCCACCTCC	181
FtPPD2	ACTGTGGCAAGGTCAATGTTTATG	AGGCAAGTGAGCAGGGTT	146
FtZML1	GCTACTGGTGATGGTGTTGG	GCTTGAACCTTCTCAGGCGTA	134
FtZML2	AACACCCAGTGTAAGCGGAATA	ATCAGCAAACGCAGCAAGAC	123
FtZML3	AGAAAAGGACCTGAAGGACCAAG	CCACTTGAAGAGCCATTTGATTG	175
