# Supplementary material for: Genome-Wide Identification and Functional Analysis of the TIFY Family Genes in Response to Abiotic Stresses and Hormone Treatments in Tartary Buckwheat (Fagopyrum tataricum)
Source: Int J Mol Sci. 2023 Jun 30;24(13):10916. doi: 10.3390/ijms241310916 (PMC10341436; doi:10.3390/ijms241310916)
Supplement: Supplementary file 1 [file ijms-24-10916-s001.zip › Table S2.xlsx]

## Sheet: Sheet1
Table S2. Primers for vector construction
Assays	Gene name	Primer name	Primer Sequence (5`-3`)
Transformation	FtJAZ5	attB1FtJAZ5-F	ggggacaagtttgtacaaaaaagcaggcttcATGGAGAGAGATTTCCTAGGTTTG
	FtJAZ5	attB2FtJAZ5-R	ggggaccactttgtacaagaaagctgggtcTTTTTTCTCACCAGTGTATGGTCC
	FtJAZ8	attB1FtJAZ8-F	ggggacaagtttgtacaaaaaagcaggcttcATGGCGAATTTGTCTGTTTCCG
	FtJAZ8	attB2FtJAZ8-R	ggggaccactttgtacaagaaagctgggtcAGAACGCGGAGCAGCAGC
	FtJAZ10	attB1FtJAZ10-F	ggggacaagtttgtacaaaaaagcaggcttcATGAAGAGAGACTGCAATCTGGA
	FtJAZ10	attB2FtJAZ10-R	ggggaccactttgtacaagaaagctgggtcACGGTTCCCCTTGTAAGG
	FtJAZ12	attB1FtJAZ12-F	ggggacaagtttgtacaaaaaagcaggcttcATGAAGAGGAACTGCAATTTGGA
	FtJAZ12	attB2FtJAZ12-R	ggggaccactttgtacaagaaagctgggtcTTCCCCACGGTTGCCATTA
Yeast two-hybrid	FtJAZ1	BDFtJAZ1-F	catggaggccgaattcATGTTGAATTCAGCGATGGCTG
	FtJAZ1	BDFtJAZ1-R	gcaggtcgacggatcccTCAGGGCTGAATCGACGT
	FtJAZ2	BDFtJAZ2-F	catggaggccgaattcATGGATTGCAATCTTGATCTCCG
	FtJAZ2	BDFtJAZ2-R	gcaggtcgacggatcccCTAATCTCTACGAATCGTATTTCCAT
	FtJAZ3	BDFtJAZ3-F	catggaggccgaattcATGGTTGAACTCGATTTCATGGG
	FtJAZ3	BDFtJAZ3-R	gcaggtcgacggatcccTCACCGGTTGTCTCCTGC
	FtJAZ4	BDFtJAZ4-F	catggaggccgaattcATGGAGAGAGATTTCTTGGGTTTG
	FtJAZ4	BDFtJAZ4-R	gcaggtcgacggatcccTCAATGTTTTTTCTCACTAGTGTATGGT
	FtJAZ5	BDFtJAZ5-F	catggaggccgaattcATGGAGAGAGATTTCCTAGGTTTGAA
	FtJAZ5	BDFtJAZ5-R	gcaggtcgacggatcccTTATTTTTTCTCACCAGTGTATGGTCC
	FtJAZ6	BDFtJAZ6-F	catggaggccgaattcATGTTGAATTCGCCTGTAACTGG
	FtJAZ6	BDFtJAZ6-R	gcaggtcgacggatcccTCACAGCAGTTCAGATCCTGTT
	FtJAZ7	BDFtJAZ7-F	catggaggccgaattcATGGAGAGAGATTTCATGGGTTTG
	FtJAZ7	BDFtJAZ7-R	gcaggtcgacggatcccCAGCTACTCCTGAAAGCTGTTG
	FtJAZ8	BDFtJAZ8-F	catggaggccgaattcATGGCGAATTTGTCTGTTTCCG
	FtJAZ8	BDFtJAZ8-R	gcaggtcgacggatcccTCAAGAACGCGGAGCAGC
	FtJAZ9	BDFtJAZ9-F	catggaggccgaattcATGGTGAATTTGTCGGCTTCC
	FtJAZ9	BDFtJAZ9-R	gcaggtcgacggatcccTCAAGAACGTGGATTAGCAGC
	FtJAZ10	BDFtJAZ10-F	catggaggccgaattcATGAAGAGAGACTGCAATCTGGAG
	FtJAZ10	BDFtJAZ10-R	gcaggtcgacggatcccTCAACGGTTCCCCTTGTAAGG
	FtJAZ12	BDFtJAZ12-F	catggaggccgaattcATGAAGAGGAACTGCAATTTGGAG
	FtJAZ12	BDFtJAZ12-R	gcaggtcgacggatcccTTATTCCCCACGGTTGCCAT
	FtTIFY1	BDFtTIFY1-F	catggaggccgaattcATGGAGAGAGATTTCATGGGATTGA
	FtTIFY1	BDFtTIFY1-R	gcaggtcgacggatcccTTAGTTACAGGTGACGTCATGGG
	FtABI5	ADFtABI5-F	ggaggccagtgaattcATGGTGGCGGCGGATAGA
	FtABI5	ADFtABI5-R	cgagctcgatggatcccTTACAATGGCCAGCTGCTGC
