# Supplementary material for: Genome-Wide Identification and Functional Analysis of the TIFY Family Genes in Response to Abiotic Stresses and Hormone Treatments in Tartary Buckwheat (Fagopyrum tataricum)
Source: Int J Mol Sci. 2023 Jun 30;24(13):10916. doi: 10.3390/ijms241310916 (PMC10341436; doi:10.3390/ijms241310916)
Supplement: Supplementary file 1 [file ijms-24-10916-s001.zip › Table S3.xlsx]

## Sheet: Sheet1
Table S3. The Ka/Ks ratio and divergence time of FtTIFY duplicated genes
Gene name	Gene name	Ka	Ks	Ka/Ks	T=Ks/2r
FtTIFY1	FtJAZ4	0.304996	0.646267	0.471935	49.7 MYA
