# Supplementary material for: Genome-Wide Identification and Functional Analysis of the TIFY Family Genes in Response to Abiotic Stresses and Hormone Treatments in Tartary Buckwheat (Fagopyrum tataricum)
Source: Int J Mol Sci. 2023 Jun 30;24(13):10916. doi: 10.3390/ijms241310916 (PMC10341436; doi:10.3390/ijms241310916)
Supplement: Supplementary file 1 [file ijms-24-10916-s001.zip › Table S4.xlsx]

## Sheet: Sheet 1
Table S4. One-to-one orthologous relationships between Tartary buckwheat and other seven plants
One-to one orthologous relationships between Tartary buckwheat and Arabidopsis
FtTIFY Gene name	FtTIFY Gene ID	AtTIFY Gene ID
FtTIFY1	FtPinG0008957700.01	AT1G70700.3
FtPPD2	FtPinG0007574300.01	AT4G14713.1
FtJAZ4	FtPinG0006092000.01	AT1G70700.3
FtJAZ10	FtPinG0006744800.01	AT1G30135.1
FtJAZ11	FtPinG0003387600.01	AT3G17860.1
FtJAZ12	FtPinG0001004100.01	AT1G30135.1
One-to-one orthologous relationships between Tartary buckwheat and rice
FtTIFY Gene name	FtTIFY Gene ID	OsTIFY Gene ID
FtJAZ12	FtPinG0001004100.01	Os07t0153000
One-to-one orthologous relationships between Tartary buckwheat and maize
FtTIFY Gene name	FtTIFY Gene ID	ZmTIFY Gene ID
FtJAZ12	FtPinG0001004100.01	Zm00001eb300140
One-to-one orthologous relationships between Tartary buckwheat and soybean
FtTIFY Gene name	FtTIFY Gene ID	GmTIFY Gene ID
FtTIFY1	FtPinG0008957700.01	KRH38274
FtZML1	FtPinG0005620000.01	KRH72475
FtZML1	FtPinG0005620000.01	KRH62254
FtZML1	FtPinG0005620000.01	KRH52967
FtZML2	FtPinG0005619800.01	KRH62255
FtZML2	FtPinG0005619800.01	KRH52968
FtPPD2	FtPinG0007574300.01	KRH35465
FtPPD2	FtPinG0007574300.01	KRG91360
FtJAZ11	FtPinG0003387600.01	KRH41663
FtJAZ12	FtPinG0001004100.01	KRH21078
FtJAZ12	FtPinG0001004100.01	KRH11175
FtJAZ12	FtPinG0001004100.01	KRH58646
FtJAZ12	FtPinG0001004100.01	KRH42552
One-to-one orthologous relationships between Tartary buckwheat and beet
FtTIFY Gene name	FtTIFY Gene ID	BvTIFY Gene ID
FtZML1	FtPinG0005620000.01	KMT20567
FtJAZ8	FtPinG0000682400.01	KMT03386
One-to-one orthologous relationships between Tartary buckwheat and tomato
FtTIFY Gene name	FtTIFY Gene ID	SlTIFY Gene ID
FtTIFY1	FtPinG0008957700.01	Solyc01g005440.3.1
FtZML1	FtPinG0005620000.01	Solyc04g076525.1.1
FtPPD2	FtPinG0007574300.01	Solyc09g065630.3.1
FtJAZ12	FtPinG0001004100.01	Solyc08g036660.3.1
FtJAZ4	FtPinG0006092000.01	Solyc01g005440.3.1
FtJAZ8	FtPinG0000682400.01	Solyc12g009220.2.1
One-to-one orthologous relationships between Tartary buckwheat and sunflower
FtTIFY Gene name	FtTIFY Gene ID	HaTIFY Gene ID
FtTIFY1	FtPinG0008957700.01	HanXRQr2_Chr12g0549801
FtTIFY1	FtPinG0008957700.01	HanXRQr2_Chr12g0533321
FtTIFY1	FtPinG0008957700.01	HanXRQr2_Chr08g0322661
FtPPD2	FtPinG0007574300.01	HanXRQr2_Chr01g0003571
FtPPD2	FtPinG0007574300.01	HanXRQr2_Chr11g0495731
FtJAZ4	FtPinG0006092000.01	HanXRQr2_Chr12g0533321
FtJAZ4	FtPinG0006092000.01	HanXRQr2_Chr08g0322661
FtJAZ4	FtPinG0006092000.01	HanXRQr2_Chr12g0549801
FtJAZ12	FtPinG0001004100.01	HanXRQr2_Chr15g0695071
FtJAZ12	FtPinG0001004100.01	HanXRQr2_Chr04g0172931
